1  
2 **The m<sup>6</sup>A writer FIONA1 methylates the 3'UTR of *FLC* and controls**  
3 **flowering in *Arabidopsis***  
4  
5

6 Bin Sun<sup>1,2,3</sup>, Kaushal Kumar Bhati<sup>1,2,4</sup>, Ashleigh Edwards<sup>1,2</sup>, Louise Petri<sup>1,2</sup>, Valdeko  
7 Kruusvee<sup>1,2</sup>, Anko Blaakmeer<sup>1,2,5</sup>, Ulla Dolde<sup>1,2,6</sup>, Vandasue Rodrigues<sup>1,2</sup>, Daniel  
8 Straub<sup>1,2,7</sup>, Stephan Wenkel<sup>1,2,8\*</sup>.

9  
10 <sup>1</sup>Department of Plant and Environmental Sciences, University of Copenhagen,  
11 Thorvaldsensvej 40, 1871 Frederiksberg C, Denmark

12 <sup>2</sup>Copenhagen Plant Science Centre, University of Copenhagen, Thorvaldsensvej 40,  
13 1871 Frederiksberg C, Denmark

14 <sup>3</sup>current address: Center for Plant Molecular Biology (ZMBP), University of Tübingen,  
15 Auf der Morgenstelle 32, 72076 Tübingen, Germany

16 <sup>4</sup>current address: Louvain Institute of Biomolecular Sciences, Catholic University of  
17 Louvain, Louvain-la-Neuve, Belgium

18 <sup>5</sup>current address: Carlsberg Research Laboratory, Copenhagen, Denmark

19 <sup>6</sup>current address: Plant Science Research Laboratory (LRSV), UMR5546  
20 CNRS/Université Toulouse 3, 31320 Castanet-Tolosan, France

21 <sup>7</sup>Quantitative Biology Center (QBiC), University of Tübingen, Auf der Morgenstelle,  
22 Tübingen, Germany.

23 <sup>8</sup>NovoCrops Center, Thorvaldsensvej 40, 1871 Frederiksberg C, Denmark

24  
25 \* Correspondence: Stephan Wenkel ([wenkel@plen.ku.dk](mailto:wenkel@plen.ku.dk))  
26

27 **ABSTRACT**

28 Adenosine bases of RNA can be transiently modified by the deposition of a methyl-  
29 group to form N<sup>6</sup>-methyladenosine (m<sup>6</sup>A). This adenosine-methylation is an ancient  
30 process and the enzymes involved are evolutionary highly conserved. A genetic  
31 screen designed to identify suppressors of late flowering transgenic *Arabidopsis*  
32 plants overexpressing the miP1a microProtein yielded a new allele of the FIONA1  
33 (FIO1) m<sup>6</sup>A-methyltransferase. To characterize the early flowering phenotype of *fio1*  
34 mutant plants we employed an integrative approach of mRNA-seq, Nanopore direct

35 RNA-sequencing and meRIP-seq to identify differentially expressed transcripts as  
36 well as differentially methylated mRNAs. We provide evidence that FIO1 is the  
37 elusive methylase responsible for the 3'-end methylation of the *FLOWERING*  
38 *LOCUS C (FLC)* transcript. Furthermore, our genetic and biochemical data suggest  
39 that 3'-methylation stabilizes *FLC* mRNAs and non-methylated *FLC* is a target for  
40 rapid degradation.

41

## 42 INTRODUCTION

43 Modification of RNA is pervasive and found across the entire tree of life (Zaccara *et al*,  
44 2019). Most abundant is the reversible conversion of adenine bases to N6-  
45 methyladenosine (m<sup>6</sup>A) in mRNA. In plants, m<sup>6</sup>A methylation patterns have been  
46 found to be highly conserved between distant ecotypes (Luo *et al*, 2014) suggesting  
47 ancient functions. In addition, loss of the METTL3-related methyltransferase MTA  
48 causes arrested development (Zhong *et al*, 2008), implying that m<sup>6</sup>A -methylation is  
49 both abundant and essential. Biochemical studies have revealed that the m<sup>6</sup>A -writer  
50 complex consists of METTL3, METTL14, and associated proteins (Liu *et al*, 2014).  
51 Besides METTL3 and METTL14, the human METTL16 methylase is also implicated  
52 in controlling m<sup>6</sup>A -methylation of mRNAs and snRNA (Pendleton *et al*, 2017) and  
53 has been shown in worms to affect diet-induced splicing of mRNA transcripts  
54 (Mendel *et al*, 2021). In plants, the functions of METTL3 (MTA) and METTL14 (MTB)  
55 (Růžička *et al*, 2017) as m<sup>6</sup>A -methylation writers are well characterized. In addition  
56 to m<sup>6</sup>A -writers, m<sup>6</sup>A -reader complexes can recognize m<sup>6</sup>A marks and affect RNA  
57 stability, splicing and translation (Arribas-Hernández *et al*, 2018). The analysis of an  
58 early flowering knock-down allele of the METTL16-homolog FIONA1, *fi01-2*,  
59 revealed changes in the m<sup>6</sup>A methylation status of many genes, several encoding  
60 flowering regulators including *SUPPRESSOR OF OVEREXPRESSION OF*  
61 *CONSTANS (SOC1)* (Xu *et al*, 2022). Besides *SOC1* mRNA, the mRNA of the  
62 flowering regulator *FLOWERING LOCUS C (FLC)* has also been shown to be  
63 modified by m<sup>6</sup>A -methylation (Xu *et al*, 2021). The latter study showed that an R-  
64 loop forms at the *FLC* locus that is resolved by the RNA-binding proteins FCA and  
65 FY. In this process, FCA binds the *FLC COOLAIR* antisense transcript to facilitate  
66 m<sup>6</sup>A -methylation (Xu *et al.*, 2021). Interestingly, the authors also detected m<sup>6</sup>A -  
67 methylation of the 3'UTR of *FLC* mRNA but this methylation appeared to be FCA-  
68 independent.

69 Here, we isolated a novel allele of *FIONA1* (*FIO1*) in a genetic screen for  
70 suppressors of the late flowering phenotype of plants overexpressing the miP1a  
71 microProtein (Graeff *et al*, 2016). We present evidence that FIO1 acts as m<sup>6</sup>A -  
72 methyltransferase in Arabidopsis and is the functional homolog of the human  
73 METTL16. Using a combination of mRNA-seq, meRIP-seq and Nanopore direct  
74 RNA-sequencing, we provide further evidence that FIO1 is the elusive 3'UTR  
75 methylase of *FLC*. Moreover, our data shows that the largely pleiotropic phenotype  
76 of *fio1* mutant plants is a result of massive transcriptome and RNA-methylome  
77 changes. In the case of *FLC*, FIO1 is needed to maintain the 3'-end methylation.  
78 Abrogation of this methylation mark causes depletion of *FLC* mRNA.

79

## 80 RESULTS

### 81 **FIONA1 acts as a floral repressor that functions partially independent of the** 82 **photoperiod pathway.**

83 The miP1a/miP1b microProteins act as suppressors of flowering by interacting with a  
84 TOPLESS-containing repressor complex (Graeff *et al.*, 2016; Rodrigues *et al*, 2021).  
85 To identify factors that are required for the repressor complex to suppress flowering,  
86 we performed a genetic screen with transgenic *miP1a-OX* (35S::*MIP1A*) plants. We  
87 identified a set of *suppressor of miP1a* (*sum*) mutants, that, despite high levels of  
88 miP1a protein, flowered early under inductive long day conditions (Rodrigues *et al.*,  
89 2021). One of the suppressors, *sum8*, we describe here, showed accelerated  
90 flowering compared to the non-mutagenized *miP1a-OX* parental plant (Fig. 1a,b). To  
91 identify the causal mutation in the *sum8* background, we crossed *miP1a-OX sum8*  
92 plants to Col-0 wildtype, self-pollinated the offspring and selected a pool of 20  
93 BASTA-resistant suppressor mutants of the following generation. Pooled DNA of the  
94 *sum8* suppressor mutant and the parental line was then analyzed by genome re-  
95 sequencing. In total, we detected 685 EMS-induced SNPs with a frequency  
96 enrichment in the middle of chromosome 2 (Fig. 1c). At the summit region of the  
97 enrichment peak we identified a point mutation in the *FIONA1* (*FIO1*) gene which  
98 converted the serine 278 into an asparagine (S278N). To verify that the mutation in  
99 *FIO1* is causal for the early flowering phenotype, we obtained a second EMS allele  
100 (*fio1-1*) that had been described earlier (Kim *et al*, 2008) and crossed it with *miP1a-*  
101 *OX sum8* plants. The resultant nullizygote offspring (*miP1a-OX/+ fio1-1/sum8*)  
102 flowered early (Fig. 2), supporting that the mutation in *FIO1* is indeed causal for the

103 flowering phenotype. The *fi01-1* allele is a splice site mutation that results in the loss  
104 of five amino acids while *sum8* is a point mutation. To obtain an additional *FIO1*  
105 allele, we used a CRISPR approach with multiple sgRNAs and obtained the new  
106 allele *fi01-3*. Like *fi01-1* and *sum8*, also *fi01-3* showed early flowering in long day  
107 conditions (Supplementary figure 1a, b). The *fi01-3* deletion occurred close to a  
108 splice site and caused the loss of amino acids 53-64 and the amino acid conversions  
109 of residues 66-72 (Supplementary Figure 1c).

110

### 111 **The loss of FIO1 function affects multiple flowering pathways.**

112 A previous genetic screen for regulators of flowering resulted in the identification of  
113 the *fi01-1* mutant that exhibited early flowering in both long- and short-day conditions  
114 (Kim *et al.*, 2008). A knock-down mutation caused by a T-DNA insertion in the 5'-  
115 region of the *FIONA1* gene (Xu *et al.*, 2022) showed a similar phenotype. The *fi01-1*  
116 mutant was shown to have elevated levels of both *CONSTANS (CO)* and  
117 *FLOWERING LOCUS T (FT)* mRNA. CO is a photoperiod-sensitive transcription  
118 factor that accumulates in response to long days to activate *FT* (Valverde *et al.*,  
119 2004), which in turn acts as florigen to induce flowering (Corbesier *et al.*, 2007;  
120 Tamaki *et al.*, 2007). The flowering phenotype of *fi01-1* was ascribed to changes in  
121 period length of the central oscillator. Consistent with previous findings, we found  
122 that levels of both *CO* and *FT* were elevated in *fi01-1* and *fi01-3* (Fig. 3a,b). A  
123 genetic interaction study revealed that *miP1a miP1b fi01-3* triple mutant plants  
124 flowered early like *fi01-3* mutant plants. The combination of *fi01* mutants with either  
125 *co* and *ft* mutants as in *fi01 co* and *fi01 ft*, revealed a promotion of flowering (Fig.  
126 3c,d) in both short days and long days. These results unequivocally show that the  
127 function of FIO1 is independent of the function of miP1a.

128

### 129 **Transcriptome analysis of *fi01-1* and *fi01-3* mutant plants.**

130 To obtain a better understanding of how FIO1 affects flowering, we performed an  
131 RNA-seq experiment with Col-0, *fi01-1* and *fi01-3* mutant plants to identify  
132 differentially expressed genes. RNA of two biological replicates of 14 day-old  
133 seedlings was isolated and sequenced on an Illumina HiSeq instrument. After  
134 removing low-quality reads, an average of 91.47% of the filtered reads was mapped  
135 to the *Arabidopsis thaliana* reference genome. Principal component analysis (PCA)  
136 and hierarchical cluster analysis (HCA) revealed that the individual biological



137 replicates clustered closely together (Fig. 4a, b), indicating a high degree of  
138 experimental reproducibility. Interestingly, *fi01-1* and *fi01-3* were also distinct from  
139 each other and wild type, indicating that although they show a similar flowering  
140 phenotype they might differ at the molecular level.

141 To identify differentially expressed genes (DEGs) in *fi01-1* and *fi01-3* we used limma-  
142 voom (Law *et al*, 2014) with a fold change cutoff of 2.0 or more. In total, we identified  
143 627 and 959 up-regulated genes in *fi01-1* plants and *fi01-3* plants respectively (P  
144 value < 0.05 and adjusted P value < 0.05; Supplementary Table 1). In total we found  
145 1071 DEGs in *fi01-1* and 1342 DEGs in *fi01-3* with an overlap of 338 up-regulated  
146 genes and 234 down-regulated genes (Fig. 4c). A total of 18 misregulated genes  
147 were associated with regulation of flowering (Fig. 4d), these include the flowering  
148 repressors *FLOWERING LOCUS C (FLC)* and *TEMPRANILLO1 (TEM1)* whose  
149 mRNA levels were significantly reduced in *fi01* mutant plants and the flowering  
150 activators *PHYTOCHROME INTERACTING FACTOR4 (PIF4)*, *FT* and *LATE*  
151 *ELONGATED HYPOCOTYL (LHY)* whose mRNA levels were significantly increased  
152 in *fi01* mutant plants (Fig. 4d). These findings are in agreement with the early  
153 flowering phenotype of *fi01* mutant plants.

154

### 155 **FIO1 is related to the human METTL16 protein.**

156 FIO1 is a nuclear localized protein containing a DUF890 domain that part of  
157 METTL16-like protein family comprising among others the human and mouse  
158 METTL16 and the *C. elegans* METT-10 proteins. Animals carrying loss-of-function  
159 alleles of METT-10/METTL16 have been described to show severe developmental  
160 defects, and sometimes, lethality (Dorsett *et al*, 2009; Mendel *et al*, 2018). The  
161 mutant phenotypes we observed in plants were rather mild regarding overall plant  
162 morphology which raised the question whether we were dealing with loss-of-function  
163 or reduced function alleles of *FIO1*. All mutants had either smaller deletions or a  
164 single amino acid change suggesting they could be weak, reduced function alleles.  
165 To gain further insights into the alleles that we had obtained, we created a homology  
166 model of the FIO1 methyltransferase (MTase) domain and compared it against the  
167 crystal structure of the human homologue, METTL16. In the case of the *sum8*  
168 mutation (S278N, Supplementary Figure 2), we found that the sidechain of S278  
169 normally forms hydrogen bonds with the nitrogen on the W330 within the protein

170 core. Upon mutating the serine to an asparagine, we expect that the larger  
171 asparagine sidechain cannot be accommodated in the protein interior, leading to  
172 disrupted domain fold and function. The *fiO1-1* mutation involves the deletion of five  
173 amino acids 145-149 in the FIO1 protein (Supplementary Figure 2) which includes  
174 the disruption of a potential hydrogen bond between the sidechains of Q82 and T147  
175 and the loss of a flexible loop connecting an alpha helix and a beta sheet. The *fiO1-3*  
176 mutation involves the large deletion of amino acids 57-68 and the non-conservative  
177 mutation of residues 53-56 and 69-72 (Supplementary Figure 2). Both *fiO1-1* and  
178 *fiO1-3* involve the large-scale disruption of hydrophobic and hydrogen bonding  
179 interactions and are likely to result in misfolded or aggregated protein. Thus, it is  
180 highly likely that all three mutations (*sum8*, *fiO1-1* and *fiO1-3*) disrupt the  
181 methyltransferase function of FIO1.

182 To validate the findings of the protein modeling we employed a second CRISPR  
183 mutagenesis approach and designed eight sgRNAs spanning the entire *FIO1* locus  
184 and transformed these in bulk to obtain larger structural mutations (Supplementary  
185 Fig. S3). We identified 11 new FIO1 alleles several of which had large structural  
186 deletions. Three new alleles (*fiO1-cr4*, *fiO1-cr9*, *fiO1-cr10*) had frame-shift mutations  
187 that would not lead to the production of functional proteins. All new alleles were  
188 viable and, apart from early flowering did not show severe developmental defects.  
189 Taken together, these results show that the loss of METTL16 function is not lethal in  
190 plants but affects the transition to flowering.

191

### 192 **FIO1 acts as m<sup>6</sup>A -methylase and methylates predominantly the 3'UTR of** 193 **mRNAs.**

194 The presence of the DUF890 domain suggests that FIO1 acts as a genuine m<sup>6</sup>A  
195 methylase. To identify the FIO1 RNA substrates, we employed a modified version of  
196 methylated RNA-immunoprecipitation (meRIP) followed by deep sequencing that  
197 was described earlier (Fig. 5a) (Dominissini *et al*, 2013). To determine methylation  
198 positions (m<sup>6</sup>A peaks) we used MACS (Zhang *et al*, 2008) with a false discovery rate  
199 (FDR) ≤ 0.05 and enrichment of ≥ 2-fold of sequence reads. In summary, we  
200 identified 2,822, 2,375 and 2,580 m<sup>6</sup>A-methylation peaks in wild type, *fiO1-1* and  
201 *fiO1-3*, respectively (Supplementary Table. 2). In *fiO1-1* plants and *fiO1-3* plants we  
202 identified 80 and 143 peaks respectively with increased m<sup>6</sup>A level compared to wild  
203 type. In contrast, a total of 850 m<sup>6</sup>A methylation peaks in *fiO1-1* and 989 peaks in

204 *flc1-3* were decreased or absent compared to the wild type (Fig. 5b). These findings  
205 suggest that FIO1 methylates mRNAs. When assessing the localization of the m<sup>6</sup>A -  
206 peaks globally in wild type, *flc1-1* and *flc1-3*, we observed more peaks in exons of  
207 *flc1* mutants and a reduced number of peaks in the 3'UTR of *flc1* mutants compared  
208 to wild type (Fig. 5c). The differential m<sup>6</sup>A peak distribution analysis (wild type versus  
209 *flc1* mutants) revealed a massive over-representation of hypomethylated peaks in  
210 3'UTRs in *flc1* mutants compared to wild type (Fig. 5d). The findings indicate that  
211 FIO1 acts as m<sup>6</sup>A methylase and methylates predominantly the 3'UTRs of its target  
212 substrates. To explore a potential connection between m<sup>6</sup>A -methylation and RNA  
213 stability we compared our mRNA-seq and MeRIP datasets. In total we found nine  
214 genes containing hypomethylated peaks, eight of which were expressed at lower  
215 levels while one was expressed at higher level in *flc1* mutants compared to the wild  
216 type (Fig. 5e).

217

### 218 **FLC is a prime target of FIO1.**

219 The mRNA of the flowering repressor *FLOWERING LOCUS C (FLC)* was identified  
220 as a prime methylation target of FIO1 (Fig. 5e). We detected strongly decreased  
221 expression of *FLC* mRNA in *flc1* mutants compared to wild type (Fig. 5f) and the  
222 m<sup>6</sup>A peak that can be detected in wild type plants is absent in *flc1-3* and strongly  
223 reduced in *flc1-1* mutant plants (Fig. 5g). To verify that *FLC* is indeed a *bona fide*  
224 methylation target of FIO1, we performed anti- m<sup>6</sup>A antibody immunoprecipitations  
225 (m<sup>6</sup>A -IP) of total RNA from wild type (Col-0), *flc1-1* and *flc1-3* seedlings followed by  
226 qPCR (m<sup>6</sup>A -IP-qPCR). We found the relative amount of m<sup>6</sup>A methylated *FLC* mRNA  
227 was strongly decreased in both *flc1* mutant plants (Fig. 5h) confirming that FIO1 is  
228 the essential m<sup>6</sup>A methylase that methylates the 3'UTR of *FLC*.

229

### 230 **Direct RNA sequencing**

231 To determine the genome-wide m<sup>6</sup>A methylation changes in *flc1* loss of function  
232 mutants compared to wild type and to validate *FLC* methylation and stability in an  
233 unbiased fashion, we employed Nanopore direct RNA sequencing. In Col-0 wild type  
234 plants, the majority (34.7%) of m<sup>6</sup>A methylations occurred in the GGACA element,  
235 followed by AGACT (27.2%), GGACT (22.9%) and GGACC (15.25) (Fig. 6A). In  
236 summary, our work defined the Arabidopsis consensus m<sup>6</sup>A methylation site as  
237 RGACH, in which R represents A or G and H all nucleotides except G, which

238 corresponds with the RRACH element that had previously been identified (Luo *et al.*,  
239 2014). FIONA1 is a methylase that adds methyl-groups to adenine bases of RNAs.  
240 Messenger-RNAs that are targets of FIO1 are therefore expected to be  
241 hypomethylated in a situation of lost or reduced FIO1 activity. Our direct RNA-  
242 sequencing approach yielded 74 genes that were hypomethylated in *fio1-1* mutants  
243 compared to wild type and 63 genes in *fio1-3* (Fig. 6C and Supplementary Table 4).  
244 Another recent direct RNA-sequencing study of the *fio1-2* knock-down mutant  
245 revealed over 2000 hypomethylated transcripts in Arabidopsis (Xu *et al.*, 2022). The  
246 comparison with our datasets identified in total 28 hypomethylated transcripts that  
247 are detected in at least two mutants (Fig. 6C and Table 1).  
248 *FLC* expression was shown to be significantly reduced in both *fio1-1* and *fio1-3*  
249 mutants and meRIP-seq detected m<sup>6</sup>A methylation in the 3'UTR of *FLC* (Fig. 4F and  
250 Fig. 5F,G). In agreement with these latter results, direct RNA-sequencing confirmed  
251 that *FLC* mRNA is depleted in both *fio1-1* and *fio1-3* mutants (Fig. 6D).

252

## 253 **DISCUSSION**

254 The precise timing of the floral transition is crucial for reproductive success.  
255 Premature as well as delayed flowering can result in seed dispersal at times where  
256 the offspring will be facing suboptimal conditions for survival and reproduction. This  
257 could either be due to the absence of pollinators or adverse environmental  
258 conditions. Therefore, a highly integrative network of transcription factors, but also  
259 epigenetic regulators, operate to ensure that flowering occurs in the most optimal  
260 conditions.  
261 Methylation of mRNA is crucial for various functions within the cell. The m<sup>6</sup>A  
262 methylation of mRNA is an ancient molecular process and its disruption strongly  
263 compromises cellular functions. Strong reduction of the global m<sup>6</sup>A methylome early  
264 in plant development, as seen in mutants lacking the *METTL3*-homolog *MTA*,  
265 causes embryonic arrest (Zhong *et al.*, 2008). Partial complementation of the *mta*  
266 mutant resulted in plants with compromised m<sup>6</sup>A levels that showed pleiotropic  
267 phenotypes such as reduced apical dominance and missing floral organs (Bodi *et al.*,  
268 2012). These latter results suggest that more subtle reductions of the global m<sup>6</sup>A  
269 levels are not detrimental to plant development. We provide further support of this by  
270 showing that the loss-of-function mutants of FIO1, a protein that is not essential for  
271 plant development, have only a subtle effect on the global m<sup>6</sup>A-methylome.

272 Furthermore, in contrast to the effect the loss of its homolog has on animal  
273 development, FIO1 is not essential and causes hypomethylation of specific  
274 transcripts. These hypomethylated mRNAs can then be stabilized, or destabilized, or  
275 mis-spliced. Affected transcripts encoding transcription factors or other regulators  
276 can subsequently induce alterations of circadian rhythms, cause changes in the  
277 production of hormones, or misregulation of other biological processes. Consistent  
278 with these multifaceted changes is the pleiotropic phenotype of *fio1* mutant plants.  
279 The precocious flowering phenotype is the most striking but *fio1* mutants additionally  
280 display a constitutive shade-avoidance phenotype, earlier senescence, and paler  
281 leaves (Kim *et al.*, 2008). In accordance with these phenotypes, our RNA-seq study  
282 revealed that several genes encoding circadian clock regulators and positive  
283 regulators of flowering time were upregulated in the *fio1* mutant background (e.g.  
284 *LHY*, *PIF4*). In contrast, several of the downregulated transcripts encoded  
285 transcription factors that repress flowering (Fig. 1D, Supplementary Table 1).  
286 Genetically, flowering is controlled by distinct pathways that interact at multiple levels  
287 to integrate inputs from all pathways. This integration ensures flowering occurs at the  
288 optimal time. The photoperiod pathway controls flowering in response to daylength  
289 and involves the B-Box zinc finger transcription factor CONSTANS (CO) which, in  
290 Arabidopsis, is stabilized at the end of long days (Valverde *et al.*, 2004). CO  
291 positively regulates the expression of *FLOWERING LOCUS T* (*FT*) (Samach *et al.*,  
292 2000), encoding a mobile protein that travels to the shoot meristem to induce  
293 flowering (Corbesier *et al.*, 2007). *FIO1* acts partially through the photoperiod  
294 pathway and the early flowering phenotype of *fio1* mutants correlates with increased  
295 levels of both CO and FT mRNAs (Fig. 3A,B) as well as increased levels of  
296 *SUPPRESSOR OF OVEREXPRESSION OF CONSTANS1* (*SOC1*) (Xu *et al.*,  
297 2022). Our genetic interaction studies have shown that mutations in both CO and FT  
298 can partially suppress the early flowering effect of *fio1* mutants. Consistent with our  
299 findings, the *soc1* mutant has also been shown to partially suppress the early  
300 flowering phenotype of *fio1-2* mutant plants (Xu *et al.*, 2022). Taken together, these  
301 data support a model that assumes an indirect effect of the photoperiod pathway in  
302 the control of flowering by FIO1.  
303 Our RNA-sequencing data identified both up- and downregulated transcripts in *fio1*  
304 mutants compared to wild type. However, the overlap between the set of de-  
305 regulated transcripts identified in *fio1-2* mutants (Xu *et al.*, 2022) is very limited. The



306 latter fact can be attributed to the different types of mutations that were analyzed.  
307 While our study capitalized on loss-of-function mutants, *fio1-2* is a T-DNA insertion  
308 line that still expresses *FIO1* mRNA, although at a lower level. Alternatively, the  
309 observed differences could be technical in nature, the result of either of the different  
310 sequencing approaches that were chosen or the growth conditions in which plants  
311 were cultivated.

312 MeRIP-sequencing further confirmed that *FIO1* is likely not the main factor in the  
313 m<sup>6</sup>A modification of mRNAs but a more selective methylase that modifies specific  
314 mRNAs. This assumption is supported by the finding that loss-of-function mutants  
315 are viable and able to produce fertile offspring. Interestingly, despite the much higher  
316 number of differentially methylated transcripts in the *fio1-2* mutant (Xu *et al.*, 2022),  
317 the comparison of the differentially hypomethylated transcripts compared to those in  
318 *fio1-1* and *fio1-3* (this study) produced only a very moderate overlap (Fig. 6C). Again,  
319 this might be due to the application of different methods or an indication that the  
320 reduction of *FIO1* activity affects the m<sup>6</sup>A methylome more strongly than does the  
321 complete loss. Furthermore, the analysis of the m<sup>6</sup>A consensus in *fio1-2* identified  
322 the YHAGA motif, which is significantly different to the RRACH motif that has been  
323 described in both plants and animals (Luo *et al.*, 2014; Warda *et al.*, 2017), and to the  
324 RGACH consensus sequence that we identify in this work (Fig. 6B).

325 Detailed analysis of specific transcripts that are differentially methylated and  
326 differentially expressed identified the flowering regulator *FLC*. Regardless of whether  
327 the contribution of *FLC* methylation contributes only marginally to the early flowering  
328 response of *fio1* mutants, our work unequivocally demonstrates that *FIO1* is the  
329 m<sup>6</sup>A-methylase that methylates the 3'UTR of *FLC* mRNA. We speculate that the  
330 failure to methylate *FLC* mRNA targets it for rapid degradation, hence the absence of  
331 *FLC* mRNA in *fio1* mutants. In any case, further characterization of the relationship  
332 between *FIO1* and the biology of *FLC* will lead to insights into the function of its 3'-  
333 end methylation.

334 Our analyses focused on the role of methylation of mRNAs and the impact on the  
335 regulation of flowering. We cannot rule out confounding effects that the loss of *FIO1*  
336 may have on the methylation and regulation of the non-coding transcriptome. Such  
337 effects might also contribute to the phenotype of *fio1* mutant plants and further  
338 characterization is needed to shed light on these processes.

339



## 340 **METHODS**

### 341 **Plant materials and growth conditions**

342 *Arabidopsis thaliana* genotypes used in the study were, if not otherwise stated, in the  
343 Columbia Col-0 background. Double and triple mutant plants, such as *fio1 co-sail*,  
344 *fio1 ft10* and *fio1 miP1a miP1b* were generated by genetic crossing. For flowering  
345 experiments, seeds were stratified 48 h at 4°C, and grown on soil in a plant growth  
346 chamber under long daylight conditions (16 h light / 8 h dark), or short daylight  
347 conditions (8 h light / 16 h dark) at 22 °C day / 20 °C night. Flowering time was  
348 measured by counting the number of rosette leaves at the bolting stage.

349 For RNA-seq, MeRIP-seq and qPCR, 14-day old seedlings were collected. Seeds  
350 were sterilized in 70% ethanol and sown on 1/2 Murashige and Skoog (MS) medium  
351 plates with 0.8% agar and kept at 4°C for 48 hours in darkness for stratification and  
352 then grown at (22 °C day / 20 °C night) and 70% humidity under long daylight  
353 conditions (16 h light / 8 h dark).

354 Loss-of-function mutants of *fio1* were generated using the CRISPR/Cas9 vector  
355 pK11.1R, containing the Cas9 expression cassette (RPS5Ap::Cas9:HspT), a sgRNA  
356 expression cassette (U6.26p::Aarl\_site:sgRNA) and, for selection the RFP  
357 expression cassette (OLE1p::OLE1:TagRFP). Single-guide RNAs (sgRNAs) were  
358 designed using the web tool CRISPR-P v 2.0 (Liu *et al*, 2017). Vectors with sgRNAs  
359 were generated according to the published description (Tsutsui & Higashiyama,  
360 2017). To create mutants with deletions, two to three *Agrobacterium* strains GV3101  
361 pMD90 with different sgRNAs (Supplementary Table. 3) were pooled and  
362 transformed into wild type plants via floral dip. RFP-positive seeds were selected  
363 using a Leica MZFLIII stereomicroscope equipped with RFP filters. Deletions were  
364 detected by PCR based sequencing.

365

### 366 **Mapping-by-sequencing**

367 91.99% sequenced reads were mapped by Bowtie2 (v2.1.0)(Langmead & Salzberg,  
368 2012) using the TAIR9 genome assembly and TAIR10 annotation from Phytozome  
369 v10.3 (phytozome.org). SNP calling was performed using samtools and BCFtools  
370 (v0.1.19)(Li, 2011; Li *et al*, 2009). 1118 (Chr1: 203, Chr2: 194, Chr3: 247, Chr4: 189,  
371 Chr5: 285) background corrected EMS-induced SNP markers were identified by  
372 SHOREmap(Schneeberger *et al*, 2009) (v3.2) using standard settings. Finally, the  
373 mutations indicated a mapping interval of 7 Mb Kb on chromosome 2, containing 84

374 mutations. The trend line is the average of all SNP allele frequencies in a sliding  
375 window (size: 2,500 Kb; step: 100 Kb).

376

### 377 **FIO1 homology modeling**

378 The methyltransferase domain of FIONA1 (UniProt accession code F4IGH3,  
379 residues 1-333) was modelled with Phyre2 (<http://www.sbg.bio.ic.ac.uk/phyre2>)  
380 using the Intensive modelling mode. The resulting homology model was aligned  
381 against the human crystal structure of the human FIONA1 homologue, METTL16  
382 (PDB ID: 6DU4) for structural analysis.”

383

### 384 **mRNA sequencing analysis**

385 For RNAseq analysis, we collected two biological replicates of 14 day-old wild type  
386 (Col-0), *fi01-1*, *fi01-3* seedlings. Total RNA was extracted from 100 *A. thaliana*  
387 seedlings for each line grown on a ½ MS agar plate using the Spectrum™ Plant  
388 Total RNA Kit (Sigma-Aldrich) following the manufacturer's instructions. Total RNA  
389 was treated with DNAase I (RapidOut DNA Removal Kit, Thermo Scientific)  
390 according to the manufacturer's instructions. Sequencing library preparation and  
391 sequencing on an Illumina HiSeq4000 instrument was performed by Novogene  
392 (Hongkong). About 3.7 Gb high-quality 150-bp paired-end reads were generated  
393 from each library. FastQC (Galaxy Version 0.72 + galaxy1) was initially run to assess  
394 the overall quality of all sample reads. Poor quality bases and adapters were filtered  
395 out using Trim Galore (Galaxy Version 0.6.3). The quality-filtered reads were aligned  
396 to the *Arabidopsis thaliana* reference genome (TAIR10) using HISAT282 (Version  
397 2.1.0 + Galaxy4) with default parameters. HTseq (Galaxy Version 0.9.1) software  
398 was used to count the number of raw reads mapped to each of the genes.

399 Differential expression analysis was performed with four analytical methods, DEseq  
400 2 (Galaxy Version 2.11.40.6+galaxy1), edgeR (Galaxy Version 3.24.1+galaxy1),  
401 Limma-voom (Galaxy Version 3.38.3+galaxy3) and Limma-trend (Galaxy Version  
402 3.38.3+galaxy3). All four statistical methods gave similar overall conclusions. We  
403 selected the most conservative results (Limma-voom; false discovery rate (FDR) =  
404 0.05) for further investigation. Significance testing was performed using the  
405 Benjamini-Hochberg method (Benjamini & Hochberg, 1995). Genes showing an  
406 absolute value of log<sub>2</sub> FC (fold change; *fi01* mutant / WT) ≥ 1.0 and adjusted P-value  
407 (false discovery rate; FDR) < 0.05 were considered as differentially expressed

408 genes. RNAseq data generated in this study has been deposited in NCBI's Gene  
409 Expression Omnibus under GEO Series accession no. GSE171926.

410

#### 411 **m6A RNA Immunoprecipitation sequencing (MeRIP-seq) and data analysis**

412 MeRIP-seq was performed as described before (Dominissini *et al.*, 2013) with  
413 modifications. Briefly, total RNA was extracted from 14 day-old *Arabidopsis thaliana*  
414 seedlings using the Spectrum™ Plant Total RNA Kit (Sigma-Aldrich) and treated  
415 with DNAase I (RapidOut DNA Removal Kit, Thermo Scientific). 300 µg of total RNA  
416 was mixed with 10× Fragmentation buffer (1 M Tris-HCl pH=7.0, 1 M ZnCl<sub>2</sub>) and  
417 placed at 94 °C for 5 min then snap cooled on ice for 5 minutes. The volume of  
418 fragmented RNA was then adjusted to 755 µl with RNase-free water. Next, 10 µL  
419 RNasin Plus RNase inhibitor (Promega, cat. no. N2611), 10 µL Ribonucleoside  
420 vanadyl complexes (RVC; 200 mM; Sigma-Aldrich, cat. no. R3380), 200 µL 5×IP  
421 buffer (50 mM Tris-HCl, 750 mM NaCl and 0.5% (vol/vol) Igepal CA-630), and 25 µL  
422 of m6A antibody (Synaptic Systems, cat. no. 202 003) were added to samples and  
423 samples were rotated at 4°C for 2 hours. After 2 hours, pre-blocked Protein A  
424 Dynabeads™ (Thermo Fisher, 1001D) was added to the RNA samples and rotated  
425 for an additional 2 hours at 4°C. After 2 hours, Dynabeads were pelleted using a  
426 magnetic stand and washed three times with 1 mL 1×IP buffer. RNA was eluted from  
427 Dynabeads by adding 98 µL elution buffer (20 mM Tris-HCl pH 7.5, 300 mM sodium  
428 acetate, 2 mM EDTA, 0.25% SDS), 2 µL of proteinase K (Thermo Fisher, AM2546)  
429 and then shaking for 1 hour at 37°C. All samples were precipitated using 3 M sodium  
430 acetate (pH 5.2) and 2.5 volumes of 100% ethanol and kept at -80°C overnight.  
431 Libraries were prepared using NEBNext Multiplex Small RNA Library Prep Set for  
432 Illumina (New England BioLabs, E7300S) according to the manufacturer's  
433 instructions. Novogene (Beijing) performed sequencing on an Illumina HiSeq4000  
434 instrument. About 3.0 Gb high-quality 150-bp paired-end reads were generated from  
435 each library. FastQC (Galaxy Version 0.72 + galaxy1) was initially run to assess the  
436 overall quality of all sample reads. Poor quality bases and adapters were filtered out  
437 using Trim Galore (Galaxy Version 0.6.3). The quality-filtered reads were aligned to  
438 the *A. thaliana* reference genome using HISAT2 (Version 2.1.0 + Galaxy4) with  
439 default parameters. To identify regions in which m6A modifications occurred, MACS  
440 (Zhang *et al.*, 2008) was used to call peaks on aligned files. The peaks showing an  
441 absolute value of log<sub>2</sub> FC (fold change; *fto1* mutant / WT) ≥ 1.0 and raw reads ≥ 50

442 were considered as differentially modified peaks. MeRIPseq data generated in this  
443 study has been deposited in NCBI's Gene Expression Omnibus under GEO Series  
444 accession no. GSE171928.

445

#### 446 **Nanopore direct RNA sequencing**

447 Total RNA was isolated as described above for mRNA-seq and direct RNA  
448 sequencing libraries were prepared by CD genomics using the Oxford Nanopore  
449 DRS protocol (SQK-RNA002, Oxford Nanopore Technologies). Samples were  
450 loaded into the Nanopore R9.4 sequencing micro-array and sequenced for 48-72 hrs  
451 using the PromethION sequencer (Oxford Nanopore Technologies). Read quality  
452 assessment, base calling and adapter trimming was carried out with the Guppy  
453 software (version 3.2.6). Nanofilt (version 2.7.1) was then used to remove low quality  
454 reads (Q-value < 7) and short-length reads (<50 bp). The clean reads were  
455 subsequently corrected using Fclmr2 (version 0.1.2). Minimap2 (version 2.17-r941)  
456 was used to map the clean reads to the *A. thaliana* genome and the alignment ratio  
457 of clean reads to the reference genes was calculated using Samtools (version 1.10).  
458 To identify m6A sites, the Tombo software de novo model together with MINES was  
459 used for calculation. Methykit software was then used to analyze differential  
460 methylation sites (DML). Logistic regression test was used to detect differential  
461 methylation sites.

462

#### 463 **RNA m<sup>6</sup>A immunoprecipitation RT-qPCR**

464 Quantitative real-time PCR was performed to assess relative abundance of m6A  
465 RNA in the RIP samples. 300 µg total RNA was adjusted the volume to 1000 µl with  
466 5×IP buffer (50 mM Tris-HCl, 750 mM NaCl and 0.5% (vol/vol) Igepal CA-630) and  
467 RNase-free water and incubated with 10 µg m6A antibody (Synaptic Systems, cat.  
468 no. 202 003, Goettingen, Germany). The mixture was rotated at 4 °C for 2 h, then  
469 pre-blocked and washed Dynabeads™ Protein A (Thermo Fisher, 1001D) were  
470 added and the mixture rotated for an additional 2 h at 4 °C. After washing with IP  
471 buffer containing Ribonucleoside vanadyl complexes (RVC, Sigma, R3380-5ML)  
472 three times, the m6A IP RNA was eluted with 98 µL elution buffer (20 mM Tris-HCl  
473 pH 7.5, 300 mM sodium acetate, 2 mM EDTA, 0.25% SDS). 2 µL of proteinase K  
474 (Thermo Fisher, AM2546) was added and the RNA incubated for 1 hour at 37°C with  
475 gentle shaking. All samples were precipitated using 3 M sodium acetate (pH 5.2) and

476 2.5 volumes of 100% ethanol and kept at -80°C overnight. cDNA was synthesized by  
477 iScript™ cDNA Synthesis Kit (Bio-Rad). qPCR analyses was done with Ultra SYBR  
478 Mixture with ROX (CW BIO) on a CFX384 Touch Real-Time PCR Detection System  
479 (Bio-Rad). qRT-PCR primers that were used to amplify *FLC* were: flc\_qF:  
480 AGCCAAGAAGACCGAACTCA and flc\_qR: TTTGTCCAGCAGGTGACATC.

481

## 482 DATA AVAILABILITY

483 All data has been submitted to public repositories and the respective links have been  
484 included in the respective sections of the material and methods.

485

## 486 REFERENCES

487 Arribas-Hernández L, Bressendorff S, Hansen MH, Poulsen C, Erdmann S, Brodersen P  
488 (2018) An m(6)A-YTH Module Controls Developmental Timing and Morphogenesis in  
489 Arabidopsis. *Plant Cell* 30: 952-967

490 Benjamini Y, Hochberg Y (1995) Controlling the False Discovery Rate: A Practical and  
491 Powerful Approach to Multiple Testing. *Journal of the Royal Statistical Society Series B*  
492 (*Methodological*) 57: 289-300

493 Bodi Z, Zhong S, Mehra S, Song J, Graham N, Li H, May S, Fray RG (2012) Adenosine  
494 Methylation in Arabidopsis mRNA is Associated with the 3' End and Reduced Levels Cause  
495 Developmental Defects. *Front Plant Sci* 3: 48

496 Corbesier L, Vincent C, Jang S, Fornara F, Fan Q, Searle I, Giakountis A, Farrona S, Gissot  
497 L, Turnbull C *et al* (2007) FT Protein Movement Contributes to Long-Distance Signaling in  
498 Floral Induction of Arabidopsis. *Science* 316: 1030-1033

499 Dominissini D, Moshitch-Moshkovitz S, Salmon-Divon M, Amariglio N, Rechavi G (2013)  
500 Transcriptome-wide mapping of N(6)-methyladenosine by m(6)A-seq based on  
501 immunocapturing and massively parallel sequencing. *Nat Protoc* 8: 176-189

502 Dorsett M, Westlund B, Schedl T (2009) METT-10, a putative methyltransferase, inhibits  
503 germ cell proliferative fate in *Caenorhabditis elegans*. *Genetics* 183: 233-247

504 Graeff M, Straub D, Eguen T, Dolde U, Rodrigues V, Brandt R, Wenkel S (2016)  
505 MicroProtein-Mediated Recruitment of CONSTANS into a TOPLESS Trimeric Complex  
506 Represses Flowering in Arabidopsis. *PLoS Genet* 12: e1005959

507 Kim J, Kim Y, Yeom M, Kim JH, Nam HG (2008) FIONA1 is essential for regulating period  
508 length in the Arabidopsis circadian clock. *Plant Cell* 20: 307-319

509 Langmead B, Salzberg SL (2012) Fast gapped-read alignment with Bowtie 2. *Nat Methods*  
510 9: 357-359

511 Law CW, Chen Y, Shi W, Smyth GK (2014) voom: Precision weights unlock linear model  
512 analysis tools for RNA-seq read counts. *Genome Biol* 15: R29



- 513 Li H (2011) A statistical framework for SNP calling, mutation discovery, association mapping  
514 and population genetical parameter estimation from sequencing data. *Bioinformatics* 27:  
515 2987-2993
- 516 Li H, Handsaker B, Wysoker A, Fennell T, Ruan J, Homer N, Marth G, Abecasis G, Durbin R  
517 (2009) The Sequence Alignment/Map format and SAMtools. *Bioinformatics* 25: 2078-2079
- 518 Liu H, Ding Y, Zhou Y, Jin W, Xie K, Chen LL (2017) CRISPR-P 2.0: An Improved CRISPR-  
519 Cas9 Tool for Genome Editing in Plants. *Mol Plant* 10: 530-532
- 520 Liu J, Yue Y, Han D, Wang X, Fu Y, Zhang L, Jia G, Yu M, Lu Z, Deng X *et al* (2014) A  
521 METTL3-METTL14 complex mediates mammalian nuclear RNA N6-adenosine methylation.  
522 *Nat Chem Biol* 10: 93-95
- 523 Luo GZ, MacQueen A, Zheng G, Duan H, Dore LC, Lu Z, Liu J, Chen K, Jia G, Bergelson J  
524 *et al* (2014) Unique features of the m6A methylome in *Arabidopsis thaliana*. *Nat Commun* 5:  
525 5630
- 526 Mendel M, Chen KM, Homolka D, Gos P, Pandey RR, McCarthy AA, Pillai RS (2018)  
527 Methylation of Structured RNA by the m(6)A Writer METTL16 Is Essential for Mouse  
528 Embryonic Development. *Mol Cell* 71: 986-1000.e1011
- 529 Mendel M, Delaney K, Pandey RR, Chen KM, Wenda JM, Vågbø CB, Steiner FA, Homolka  
530 D, Pillai RS (2021) Splice site m(6)A methylation prevents binding of U2AF35 to inhibit RNA  
531 splicing. *Cell*
- 532 Pendleton KE, Chen B, Liu K, Hunter OV, Xie Y, Tu BP, Conrad NK (2017) The U6 snRNA  
533 m(6)A Methyltransferase METTL16 Regulates SAM Synthetase Intron Retention. *Cell* 169:  
534 824-835.e814
- 535 Rodrigues VL, Dolde U, Sun B, Blaakmeer A, Straub D, Eguen T, Botterweg-Paredes E,  
536 Hong S, Graeff M, Li MW *et al* (2021) A microProtein repressor complex in the shoot  
537 meristem controls the transition to flowering. *Plant Physiol*
- 538 Růžička K, Zhang M, Campilho A, Bodi Z, Kashif M, Saleh M, Eeckhout D, El-Showk S, Li H,  
539 Zhong S *et al* (2017) Identification of factors required for m(6) A mRNA methylation in  
540 *Arabidopsis* reveals a role for the conserved E3 ubiquitin ligase HAKAI. *New Phytol* 215:  
541 157-172
- 542 Samach A, Onouchi H, Gold SE, Ditta GS, Schwarz-Sommer Z, Yanofsky MF, Coupland G  
543 (2000) Distinct Roles of CONSTANS Target Genes in Reproductive Development of  
544 *Arabidopsis*. *Science* 288: 1613-1616
- 545 Schneeberger K, Ossowski S, Lanz C, Juul T, Petersen AH, Nielsen KL, Jorgensen J-E,  
546 Weigel D, Andersen SU (2009) SHOREmap: simultaneous mapping and mutation  
547 identification by deep sequencing. *Nat Meth* 6: 550-551
- 548 Tamaki S, Matsuo S, Wong HL, Yokoi S, Shimamoto K (2007) Hd3a Protein Is a Mobile  
549 Flowering Signal in Rice. *Science* 316: 1033-1036
- 550 Tsutsui H, Higashiyama T (2017) pKAMA-ITACHI Vectors for Highly Efficient CRISPR/Cas9-  
551 Mediated Gene Knockout in *Arabidopsis thaliana*. *Plant Cell Physiol* 58: 46-56



- 552 Valverde F, Mouradov A, Soppe W, Ravenscroft D, Samach A, Coupland G (2004)  
553 Photoreceptor regulation of CONSTANS protein in photoperiodic flowering. *Science* 303:  
554 1003-1006
- 555 Warda AS, Kretschmer J, Hackert P, Lenz C, Urlaub H, Höbartner C, Sloan KE, Bohnsack  
556 MT (2017) Human METTL16 is a N(6)-methyladenosine (m(6)A) methyltransferase that  
557 targets pre-mRNAs and various non-coding RNAs. *EMBO Rep* 18: 2004-2014
- 558 Xu C, Wu Z, Duan HC, Fang X, Jia G, Dean C (2021) R-loop resolution promotes co-  
559 transcriptional chromatin silencing. *Nat Commun* 12: 1790
- 560 Xu T, Wu X, Wong CE, Fan S, Zhang Y, Zhang S, Liang Z, Yu H, Shen L (2022) FIONA1-  
561 Mediated m(6) A Modification Regulates the Floral Transition in Arabidopsis. *Adv Sci*  
562 (*Weinh*): e2103628
- 563 Zaccara S, Ries RJ, Jaffrey SR (2019) Reading, writing and erasing mRNA methylation. *Nat*  
564 *Rev Mol Cell Biol* 20: 608-624
- 565 Zhang Y, Liu T, Meyer CA, Eeckhoute J, Johnson DS, Bernstein BE, Nusbaum C, Myers  
566 RM, Brown M, Li W *et al* (2008) Model-based analysis of ChIP-Seq (MACS). *Genome Biol* 9:  
567 R137
- 568 Zhong S, Li H, Bodi Z, Button J, Vespa L, Herzog M, Fray RG (2008) MTA is an Arabidopsis  
569 messenger RNA adenosine methylase and interacts with a homolog of a sex-specific  
570 splicing factor. *Plant Cell* 20: 1278-1288  
571

## 572 **ACKNOWLEDGEMENTS**

573 We acknowledge funding through NovoCrops Centre (Novo Nordisk Foundation  
574 project number 2019OC53580 to S. W.), the Independent Research Fund Denmark  
575 (0136-00015B and 0135-00014B to S. W.), the Novo Nordisk Foundation  
576 (NNF18OC0034226 and NNF20OC0061440 to S. W.).

577

## 578 **AUTHOR CONTRIBUTIONS**

579 BS, KKB and SW designed the study; BS, KKB, AE, LP, VK, AB, UD, VR and DS  
580 performed experiments; BS, KKB, DS and SW analyzed the data; SW provided  
581 supervision and wrote the manuscript with input from all co-authors.

582

## 583 **FIGURE LEGENDS**

584

585 **Figure 1 - Identification of flowering repressor FIONA1 by whole-genome re-**  
586 **sequencing.**

587 **(A)** Phenotype of the *sum8 (fio1)* mutant in the miP1a-OX background compared to  
588 the Col-0 wildtype grown in LD conditions.

589 **(B)** Determination of flowering by counting the number of rosette leaves (RLN =  
590 rosette leaf number) at the bolting stage in LD. Plotted are average leaf number +/-  
591 SD, \*\*\* $p < 0.001$ , N=10.

592 **(C)** Mapping-by-sequencing of the *sum8* suppressor mutation. Plotted are SNP  
593 frequencies of a pool of segregating F2 plants. Increased SNP frequencies were  
594 observed in chromosome 2 and the *FIO1* locus is at the summit of the plot.

595

596 **Figure 2 – *FIO1* is the gene affected by the *sum8* mutation.**

597 **(A)** Genetic complementation experiment proving that the *sum8* mutation affects  
598 *FIO1*. Shown are the flowering phenotypes of plants grown in LD conditions.

599 **(B)** Determination of flowering by counting the number of rosette leaves (RLN =  
600 rosette leaf number) at the bolting stage in LD. Plotted are average leaf number +/-  
601 SD, \*\*\* $p < 0.001$ , N=10.

602

603 **Figure 3 – *FIONA1* acts partially independent of the photoperiod pathway to**  
604 **repress flowering.**

605 **(A)** and **(B)** Quantification of *CO* and *FT* in Col-0, *fi01-1* and *fi01-3* by qRT-PCR.  
606 Values are the means  $\pm$ SD. N = 4. \*  $P \leq 0.01$ .

607 **(C)** Phenotypes of *miP1a miP1b*, *fi01-1*, *fi01-3*, *miP1a miP1b fi01-3*, *co-sail*, *co-sail*  
608 *fi01-1*, *co-sail fi01-3*, *ft10*, *ft10 fi01-1*, *ft10 fi01-3* and determination of flowering time  
609 by counting the number of rosette leaves at bolting compare to wild type, under long  
610 day conditions. RLN = number of rosette leaves at the bolting stage. Values are the  
611 means  $\pm$ SD. N = 10 to 20. One-way ANOVA was carried out to test significance, \*\* $P$   
612  $\leq 0.005$ , \*\*\* $P \leq 0.001$ .

613 **(D)** Phenotypes of *miP1a miP1b*, *fi01-1*, *fi01-3*, *miP1a miP1b fi01-3*, *co-sail*, *co-sail*  
614 *fi01-1*, *co-sail fi01-3*, *ft10*, *ft10 fi01-1*, *ft10 fi01-3* and determination of flowering time  
615 by counting the number of rosette leaves at bolting compare to wild type, under short  
616 day conditions. RLN = number of rosette leaves at the bolting stage. Values are the  
617 means  $\pm$ SD. N = 10 to 12. One-way ANOVA was carried out to test significance,  
618 \*\*\* $P \leq 0.001$ .

619

620

621

622

623 **Figure 4 – Transcriptome changes observed in *fla1* mutants.**

624 **(A)** Principal component analysis (PCA) plot displaying the different RNA-seq  
625 performed using DESeq2 rlog-normalized RNA-seq data. Plotted is the percentage  
626 of variance for each component.

627 **(B)** Hierarchical clustering analysis (HCA) of the different RNA-seq libraries. The  
628 heatmap was built using the DESeq2 package. Samples were clustered using HCA  
629 performed with DESeq2 rlog-normalized RNA-seq data, and the dendrogram  
630 represents the clustering results. The heatmap illustrates the pairwise distances  
631 between the different samples, with higher similarity indicated by higher intensity of  
632 color.

633 **(C)** Venn diagram showing the overlap of differentially expressed genes in *fla1-1* and  
634 *fla1-3* compared to the wild type. The absolute value of log<sub>2</sub> FC (fold change; *fla1*  
635 mutant / WT) ≥ 1.0 and adjusted P-value (false discovery rate; FDR) ≤ 0.05.

636 **(D)** RNA-seq showing the expression levels of flowering related genes in *fla1-1* and  
637 *fla1-3* compared to the wild type. The absolute value of log<sub>2</sub> FC (fold change; *fla1*  
638 mutant / WT) ≥ 1.0 and adjusted P-value (false discovery rate; FDR) ≤ 0.05.

639

640 **Figure 5 – FIONA1 acts as m<sup>6</sup>A-methyltransferase in Arabidopsis**

641 **(A)** Depiction of the meRIP-seq method. In brief, total RNA was isolated from  
642 seedlings and subsequently fragmented into small (100bp) fragments. After  
643 immunoprecipitation with an m<sup>6</sup>A -specific antibody, Illumina short-read sequencing  
644 libraries were generated and sequenced. After mapping all reads to the Arabidopsis  
645 genome, m<sup>6</sup>A peak regions (pink star) could be identified.

646 **(B)** Venn diagram showing the overlap of the hypermethylated and hypomethylated  
647 m<sup>6</sup>A peaks identified in *fla1-1*, *fla1-3* compared to Col-0 wild type plants.

648 **(C)** Comparison of distribution of m<sup>6</sup>A peaks in different segments of wild-type (left  
649 panel), *fla1-1* (middle panel) and *fla1-3* (right panel) transcripts. The panels show pie  
650 charts presenting the percentages of m<sup>6</sup>A peaks in different transcript segments.

651 **(D)** Comparison of distribution of m<sup>6</sup>A peaks in different segments of differently  
652 methylated peaks (left panel), hypermethylated peaks (middle panel) and  
653 hypomethylated peaks (right panel) in the overlap of *fla1-1* and *fla1-3* compared to  
654 wild type. The panels show pie charts presenting the percentages of m<sup>6</sup>A peaks in  
655 different transcript segments.

656 **(E)** Expression levels and m<sup>6</sup>A methylation levels of the transcripts in the overlapping  
657 of RNAseq and MeRIPseq. Gene expression levels were derived from RNA-Seq  
658 data. m<sup>6</sup>A methylation levels were derived from MeRIPseq data.

659 **(F)** RNA-seq coverage observed at the *FLC* locus. RNA-seq reads in Col-0 (grey),  
660 *flc1-1* (blue) and *flc1-3* (pink). Gene model depicts exons and introns.

661 **(G)** MeRIP-seq coverage observed at the *FLC* locus. RNA-seq reads in Col-0 (grey),  
662 *flc1-1* (blue) and *flc1-3* (pink). Gene model depicts exons and introns.

663 **(H)** Percentages of the m<sup>6</sup>A methylated FLC mRNA in input samples in the wild type,  
664 *flc1-1* and *flc1-3* measured by m<sup>6</sup>A-IP-qRT PCR. Values are the means  $\pm$ SD. N = 4,  
665 \*\*\*P $\leq$  0.001.

666

### 667 **Figure 6 – Direct RNA-sequencing analysis**

668 **(A)** Distribution of m<sup>6</sup>A methylations detected by direct RNA-sequencing.

669 **(B)** Logo of the conserved m<sup>6</sup>A sequence motif detected by direct RNA-sequencing.

670 **(C)** Venn diagram showing the overlap of the hypomethylated m<sup>6</sup>A transcripts  
671 identified in *flc1-1*, *flc1-2* and *flc1-3* compared to Col-0 wild type plants.

672 **(D)** Sequence coverage observed at the *FLC* locus. Direct RNA-seq reads in Col-0,  
673 *flc1-1* and *flc1-3*. Gene model depicts exons and introns.

674

### 675 **Table 1 – Comparative analysis of hypomethylated transcripts in *flc1-1*, *flc1-2*** 676 **and *flc1-3* relative to wild type Col-0.**

677

678

## 679 **SUPPLEMENTARY MATERIAL**

680

## 681 **SUPPLEMENTARY FIGURES**

### 682 **Figure S1 – Analysis of *flc1-3*, a CRISPR-induced mutation in *FLC*.**

683 **(A)** Phenotype of *flc1-3* compared to the Col-0 wildtype when grown in LD  
684 conditions.

685 **(B)** Determination of flowering by counting the number of rosette leaves (RLN =  
686 rosette leaf number) at the bolting stage in LD. Plotted are average leaf number  $\pm$   
687 SD, \*\*\*p $\leq$ 0.001, N=10-14.

688 **(C)** Nucleotide alignment showing the CRISPR-induced genomic deletion found in  
689 *flc1-3*. Gene model on top shows the relative positions of all three *flc1* mutations.

690

691 **Figure S2 – Analysis of FIO1 methyltransferase domain mutants based on**  
692 **homology model.**

693 The three mutants were mapped to the homology model of FIO1 (see Materials and  
694 Methods). The *fi01-1* mutation involved the loss of five amino acids highlighted in  
695 pink, including the loss of a potential hydrogen bond between the threonine and  
696 asparagine. The *sum8* mutation changes the serine (orange), which normally  
697 hydrogen bonds to a tryptophan, into an asparagine. The resulting larger side-chain  
698 of asparagine is unlikely to be accommodated in the constrained protein interior,  
699 leading to changes in the protein structure and loss of function. The *fi01-3* mutation  
700 involves a large deletion (orange) and missense mutations (light cyan) in a partially  
701 buried alpha helix, which are very likely to disrupt protein folding and function.

702

703 **Figure S3 – Overview of additional CRISPR-induced mutations in FIO1.**

704 Gene model depicting the *FIO1* locus (exons in dark read and location of sgRNAs in  
705 purple). All sgRNAs were transformed in bulk and from all early flowering individuals  
706 the *FIO1* gene was sequenced to determine the nature of CRISPR-induced  
707 mutations. To determine the correct reading frame, RNA was isolated and *FIO1* was  
708 amplified on cDNA and subsequently sequenced.

709

710 **SUPPLEMENTARY TABLES**

711 **Supplementary table 1: DEGs identified in *fi01-1* and *fi01-3* by RNAseq.**

712 **Supplementary table 2: Methylation peaks identified by MeRIP-seq.**

713 **Supplementary table 3: Oligonucleotide sequences.**

714 **Supplementary table 4: Hypomethylated transcripts identified in *fi01-1* and**  
715 ***fi01-3***

716

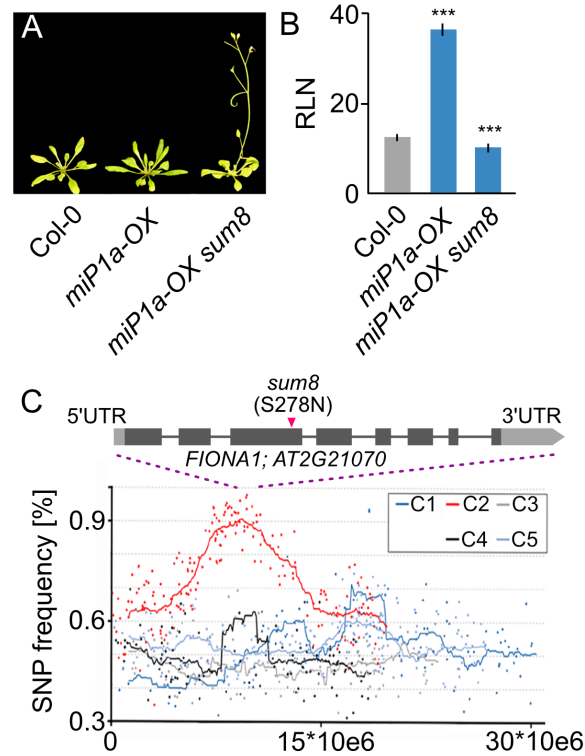

**Figure 1 - Identification of flowering repressor FIONA1 by whole-genome re-sequencing.**

**(A)** Phenotype of the *sum8* (*fio1*) mutant in the miP1a-OX background compared to the Col-0 wildtype grown in LD conditions.

**(B)** Determination of flowering by counting the number of rosette leaves (RLN = rosette leaf number) at the bolting stage in LD. Plotted are average leaf number +/- SD, \*\*\* $p < 0.001$ , N=10.

**(C)** Mapping-by-sequencing of the *sum8* suppressor mutation. Plotted are SNP frequencies of a pool of segregating F2 plants. Increased SNP frequencies were observed in chromosome 2 and the *FIO1* locus is at the summit of the plot.



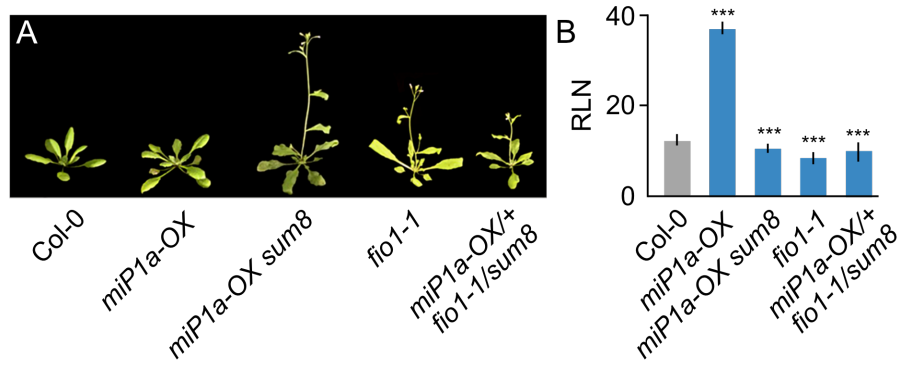

**Figure 2 – FIO1 is the gene affected by the *sum8* mutation.**

**(A)** Genetic complementation experiment proving that the *sum8* mutation affects FIO1. Shown are the flowering phenotypes of plants grown in LD conditions.

**(B)** Determination of flowering by counting the number of rosette leaves (RLN = rosette leaf number) at the bolting stage in LD. Plotted are average leaf number +/- SD, \*\*\* $p < 0.001$ , N=10.

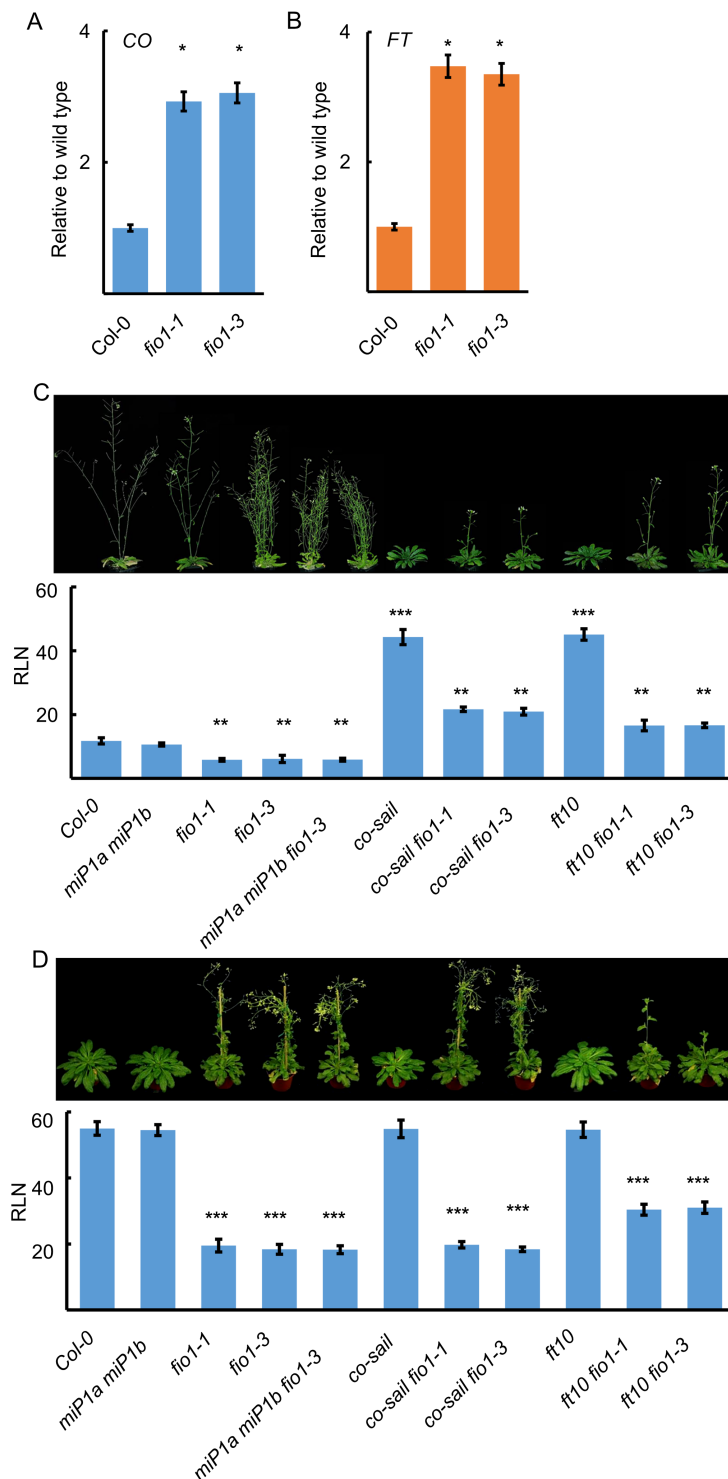

**Figure 3 – FIONA1 acts partially independent of the photoperiod pathway to repress flowering.**

**(A)** and **(B)** Quantification of *CO* and *FT* in Col-0, *fio1-1* and *fio1-3* by qRT-PCR. Values are the means  $\pm$ SD. N = 4. \*  $P \leq 0.01$ .

**(C)** Phenotypes of *miP1a miP1b*, *fio1-1*, *fio1-3*, *miP1a miP1b fio1-3*, *co-sail*, *co-sail fio1-1*, *co-sail fio1-3*, *ft10*, *ft10 fio1-1*, *ft10 fio1-3* and determination of flowering time by counting the number of rosette leaves at bolting compare to wild type, under long day conditions. RLN = number of rosette leaves at the bolting stage. Values are the means  $\pm$ SD. N = 10 to 20. One-way ANOVA was carried out to test significance, \*\* $P \leq 0.005$ , \*\*\* $P \leq 0.001$ .

**(D)** Phenotypes of *miP1a miP1b*, *fio1-1*, *fio1-3*, *miP1a miP1b fio1-3*, *co-sail*, *co-sail fio1-1*, *co-sail fio1-3*, *ft10*, *ft10 fio1-1*, *ft10 fio1-3* and determination of flowering time by counting the number of rosette leaves at bolting compare to wild type, under short day conditions. RLN = number of rosette leaves at the bolting stage. Values are the means  $\pm$ SD. N = 10 to 12. One-way ANOVA was carried out to test significance, \*\*\* $P \leq 0.001$ .

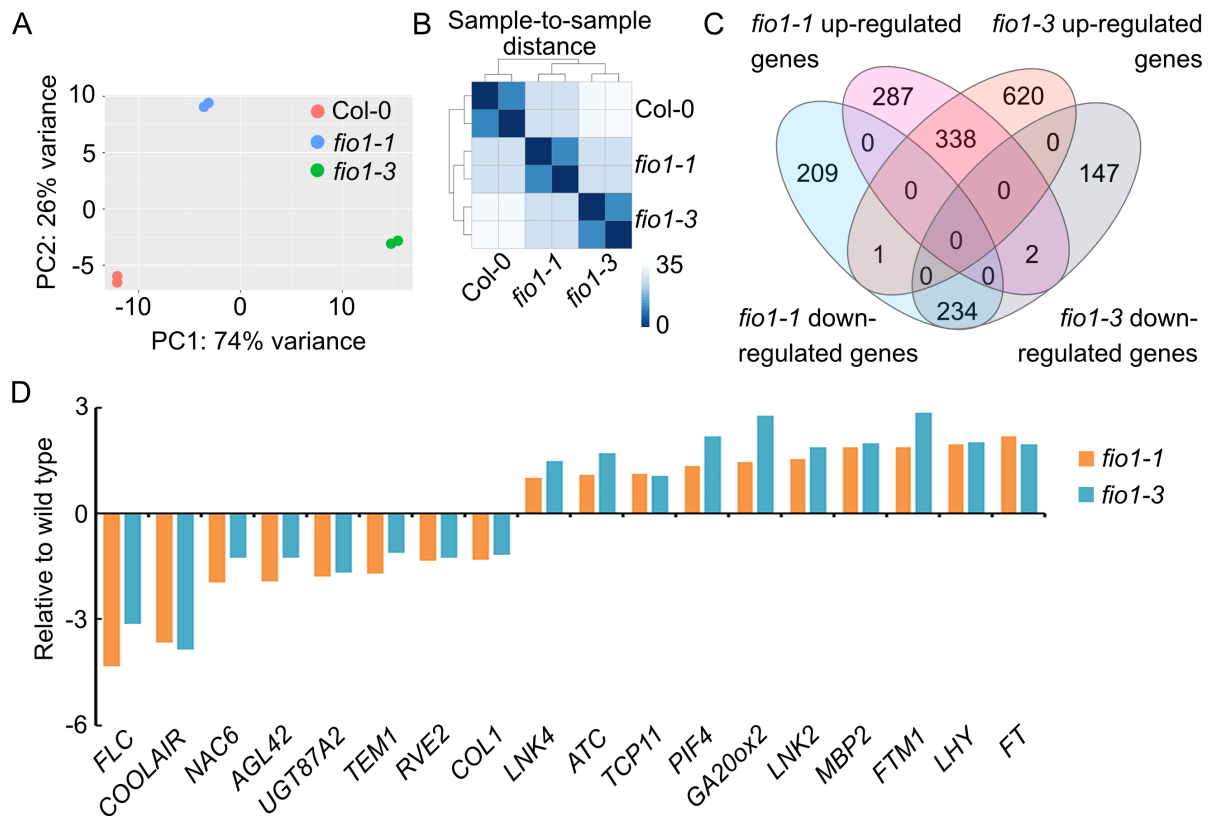

**Figure 4 – Transcriptome changes observed in *fio1* mutants.**

**(A)** Principal component analysis (PCA) plot displaying the different RNA-seq performed using DESeq2 rlog-normalized RNA-seq data. Plotted is the percentage of variance for each component.

**(B)** Hierarchical clustering analysis (HCA) of the different RNA-seq libraries. The heatmap was built using the DESeq2 package. Samples were clustered using HCA performed with DESeq2 rlog-normalized RNA-seq data, and the dendrogram represents the clustering results. The heatmap illustrates the pairwise distances between the different samples, with higher similarity indicated by higher intensity of color.

**(C)** Venn diagram showing the overlap of differentially expressed genes in *fio1-1* and *fio1-3* compared to the wild type. The absolute value of log<sub>2</sub> FC (fold change; *fio1* mutant / WT) ≥ 1.0 and adjusted P-value (false discovery rate; FDR) ≤ 0.05.

**(D)** RNA-seq showing the expression levels of flowering related genes in *fio1-1* and *fio1-3* compared to the wild type. The absolute value of log<sub>2</sub> FC (fold change; *fio1* mutant / WT) ≥ 1.0 and adjusted P-value (false discovery rate; FDR) ≤ 0.05.



- (C)** Comparison of distribution of m<sup>6</sup>A peaks in different segments of wild-type (left panel), *flc1-1* (middle panel) and *flc1-3* (right panel) transcripts. The panels show pie charts presenting the percentages of m<sup>6</sup>A peaks in different transcript segments.
- (D)** Comparison of distribution of m<sup>6</sup>A peaks in different segments of differently methylated peaks (left panel), hypermethylated peaks (middle panel) and hypomethylated peaks (right panel) in the overlap of *flc1-1* and *flc1-3* compared to wild type. The panels show pie charts presenting the percentages of m<sup>6</sup>A peaks in different transcript segments.
- (E)** Expression levels and m<sup>6</sup>A methylation levels of the transcripts in the overlapping of RNAseq and MeRIPseq. Gene expression levels were derived from RNA-Seq data. m<sup>6</sup>A methylation levels were derived from MeRIPseq data.
- (F)** RNA-seq coverage observed at the *FLC* locus. RNA-seq reads in Col-0 (grey), *flc1-1* (blue) and *flc1-3* (pink). Gene model depicts exons and introns.
- (G)** MeRIP-seq coverage observed at the *FLC* locus. RNA-seq reads in Col-0 (grey), *flc1-1* (blue) and *flc1-3* (pink). Gene model depicts exons and introns.
- (H)** Percentages of the m<sup>6</sup>A methylated *FLC* mRNA in input samples in the wild type, *flc1-1* and *flc1-3* measured by m<sup>6</sup>A-IP-qRT PCR. Values are the means  $\pm$ SD. N = 4, \*\*\*P  $\leq$  0.001.

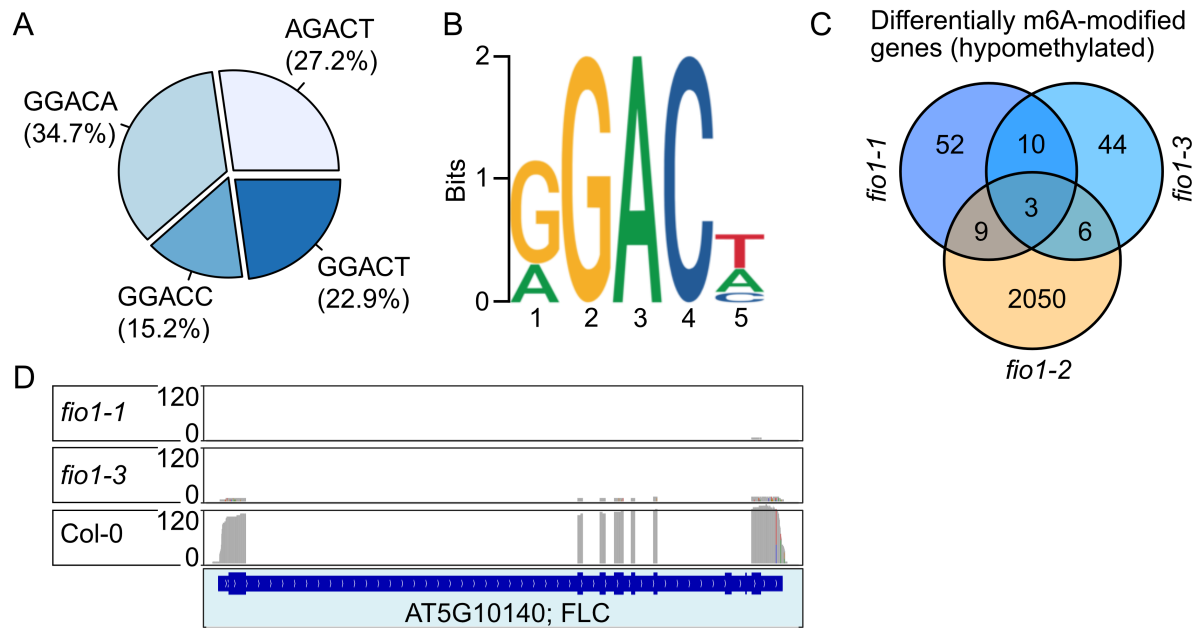

**Figure 6 – Direct RNA-sequencing analysis**

(A) Distribution of m6A methylations detected by direct RNA-sequencing.

(B) Logo of the conserved m6A sequence motif detected by direct RNA-sequencing.

(C) Venn diagram showing the overlap of the hypomethylated m<sup>6</sup>A transcripts identified in *fio1-1*, *fio1-2* and *fio1-3* compared to Col-0 wild type plants.

(D) Sequence coverage observed at the *FLC* locus. Direct RNA-seq reads in Col-0, *fio1-1* and *fio1-3*. Gene model depicts exons and introns.



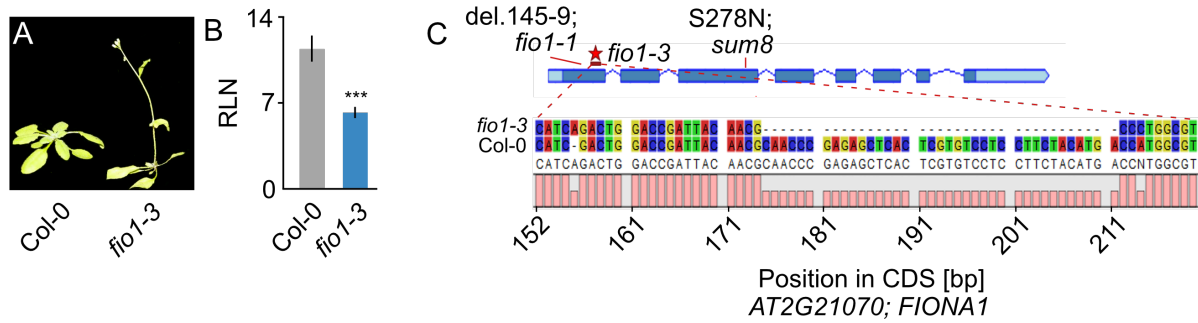

**Figure S1 – CRISPR-induced mutation in *FIO1*.**

**(A)** Phenotype of *fio1-3* compared to the *Col-0* wildtype when grown in LD conditions.

**(B)** Determination of flowering by counting the number of rosette leaves (RLN = rosette leaf number) at the bolting stage in LD. Plotted are average leaf number +/- SD, \*\*\*p < 0.001, N=10-14.

**(C)** Nucleotide alignment showing the CRISPR-induced genomic deletion found in *fio1-3*. Gene model on top shows the relative positions of all three *fio1* mutations.

Sun et al. Supplementary Figure S2

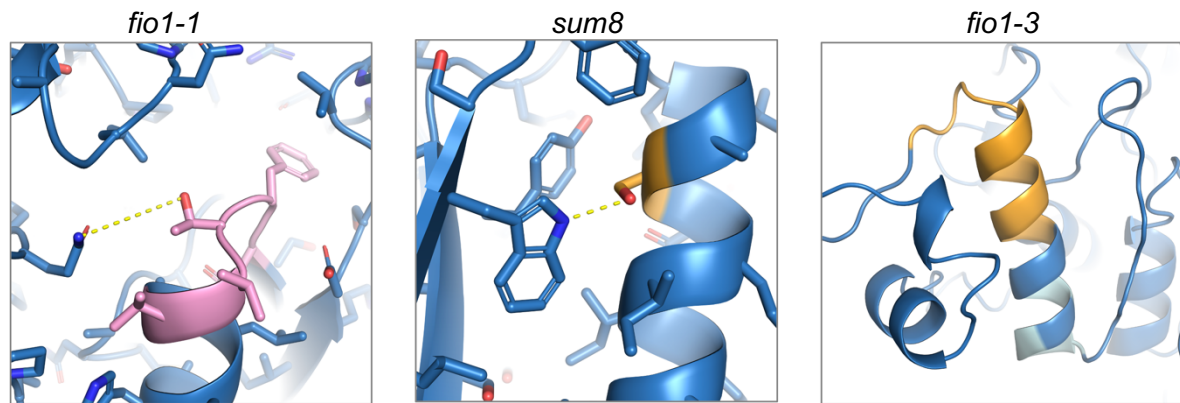

**Supplementary Figure S2 – Analysis of FIO1 methyltransferase domain mutants based on homology model.**

The three mutants were mapped to the homology model of FIO1 (see Materials and Methods). The *fio1-1* mutation involved the loss of five amino acids highlighted in pink, including the loss of a potential hydrogen bond between the threonine and asparagine. The *sum8* mutation changes the serine (orange), which normally hydrogen bonds to a tryptophan, into an asparagine. The resulting larger side-chain of asparagine is unlikely to be accommodated in the constrained protein interior, leading to changes in the protein structure and loss of function. *Fio1-3* mutation involves a large deletion (orange) and missense mutations (light cyan) in a partially buried alpha helix, which are very likely to disrupt protein folding and function.

Sun et al. Supplementary Figure S3

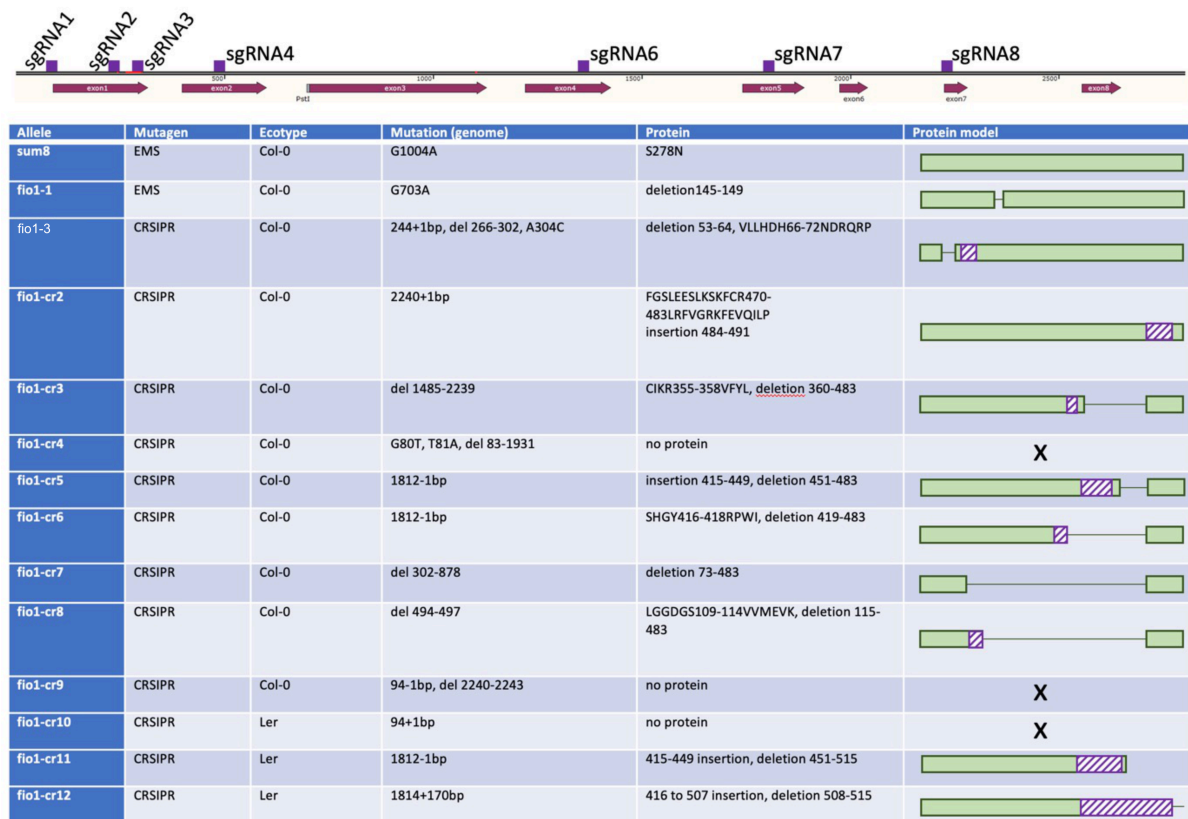

**Supplementary Figure S3 – CRISPR-induced mutation in *FIO1*.**

Gene model depicting the *FIO1* locus (exons in dark red and location of sgRNAs in purple). All sgRNAs were transformed in bulk and from all early flowering individuals the *FIO1* gene was sequenced to determine the nature of CRISPR-induced mutations. To determine the correct reading frame, RNA was isolated and *FIO1* was amplified on cDNA and subsequently sequenced.

Table 1

| Arabidopsis Gene Identifier (AGI) | Hypomethylated |               |               | Annotation                                                                          |
|-----------------------------------|----------------|---------------|---------------|-------------------------------------------------------------------------------------|
|                                   |                |               |               |                                                                                     |
| AT1G12840                         | <i>fio1-1</i>  | <i>fio1-3</i> |               | DET3, ATVHA-C, ARABIDOPSIS THALIANA VACUOLAR ATP SYNTHASE SUBUNIT C, DE-ETIOLATED 3 |
| AT1G19980                         | <i>fio1-1</i>  | <i>fio1-3</i> |               | no symbol available                                                                 |
| AT1G52040                         | <i>fio1-1</i>  | <i>fio1-3</i> |               | MBP1, ATMBP, myrosinase-binding protein 1                                           |
| AT1G52710                         | <i>fio1-1</i>  | <i>fio1-3</i> |               | no symbol available                                                                 |
| AT1G76730                         | <i>fio1-1</i>  | <i>fio1-3</i> |               | COG0212, Clusters of Orthologous group 212                                          |
| AT2G18050                         | <i>fio1-1</i>  | <i>fio1-3</i> |               | HIS1-3, histone H1-3                                                                |
| AT2G40480                         | <i>fio1-1</i>  | <i>fio1-3</i> |               | no symbol available                                                                 |
| AT5G18790                         | <i>fio1-1</i>  | <i>fio1-3</i> |               | no symbol available                                                                 |
| AT5G56860                         | <i>fio1-1</i>  | <i>fio1-3</i> |               | GNC, GATA21, GATA TRANSCRIPTION FACTOR 21                                           |
| AT5G64860                         | <i>fio1-1</i>  | <i>fio1-3</i> |               | AtDPE1, DPE1, disproportionating enzyme                                             |
| AT1G50250                         | <i>fio1-1</i>  | <i>fio1-2</i> |               | FTSH1, FTSH protease 1                                                              |
| AT1G52400                         | <i>fio1-1</i>  | <i>fio1-2</i> |               | BGL1, ATBG1, BGLU18, A. THALIANA BETA-GLUCOSIDASE 1                                 |
| AT1G63770                         | <i>fio1-1</i>  | <i>fio1-2</i> |               | no symbol available                                                                 |
| AT2G30520                         | <i>fio1-1</i>  | <i>fio1-2</i> |               | RPT2, ROOT PHOTOTROPISM 2                                                           |
| AT2G47940                         | <i>fio1-1</i>  | <i>fio1-2</i> |               | DEG2, DEGP2, EMB3117   DEGP protease 2,                                             |
| AT3G10060                         | <i>fio1-1</i>  | <i>fio1-2</i> |               | no symbol available                                                                 |
| AT3G51950                         | <i>fio1-1</i>  | <i>fio1-2</i> |               | no symbol available                                                                 |
| AT5G42650                         | <i>fio1-1</i>  | <i>fio1-2</i> |               | CYP74A, AOS, DDE2, allene oxide synthase, DELAYED DEHISCENCE 2, CYTOCHROME P450 74A |
| AT5G66190                         | <i>fio1-1</i>  | <i>fio1-2</i> |               | LFNR1, ATLFNR1, FNR1, leaf-type chloroplast-targeted FNR 1, LEAF FNR 1              |
| AT1G67480                         | <i>fio1-2</i>  | <i>fio1-3</i> |               | no symbol available                                                                 |
| AT2G22990                         | <i>fio1-2</i>  | <i>fio1-3</i> |               | SNG1, SCPL8, sinapoylglucose 1                                                      |
| AT4G19110                         | <i>fio1-2</i>  | <i>fio1-3</i> |               | no symbol available                                                                 |
| AT4G19160                         | <i>fio1-2</i>  | <i>fio1-3</i> |               | no symbol available                                                                 |
| AT5G25265                         | <i>fio1-2</i>  | <i>fio1-3</i> |               | HPAT1, hydroxyproline O-arabinosyltransferase 1                                     |
| AT5G57560                         | <i>fio1-2</i>  | <i>fio1-3</i> |               | XTH22, TCH4, Touch 4, xyloglucan endotransglucosylase/hydrolase 22                  |
| AT2G01490                         | <i>fio1-1</i>  | <i>fio1-2</i> | <i>fio1-3</i> | PAHX   phytanoyl-CoA 2-hydroxylase                                                  |
| AT2G28900                         | <i>fio1-1</i>  | <i>fio1-2</i> | <i>fio1-3</i> | OEP16, OEP16-1, ATOEP16-L, ATOEP16-1, outer plastid envelope protein 16-1           |
| AT4G08950                         | <i>fio1-1</i>  | <i>fio1-2</i> | <i>fio1-3</i> | EXO, EXORDIUM                                                                       |
